# Supplementary material
Source: publisher figshare collection journal article supplement (https://acs.figshare.com/ndownloader/files/3721552)
Supplement: Supplementary file 1 [file 3721552]

Supporting Information for:

Operating and Sensing Mechanism of  
Electrolyte-Gated Transistors with Floating Gates:  
Building a Platform for Amplified Biodetection

*Scott P. White, Kevin D. Dorfman, C. Daniel Frisbie*

Department of Chemical Engineering and Materials Science

University of Minnesota, Minneapolis, MN, 55455

**1. Additional images of the device architecture.** Figure S1 depicts an image of a printed P3HT film, an optical image of an FG-EGT, and a schematic of the microfluidic channels used to selectively functionalize the floating gate with SAMs.

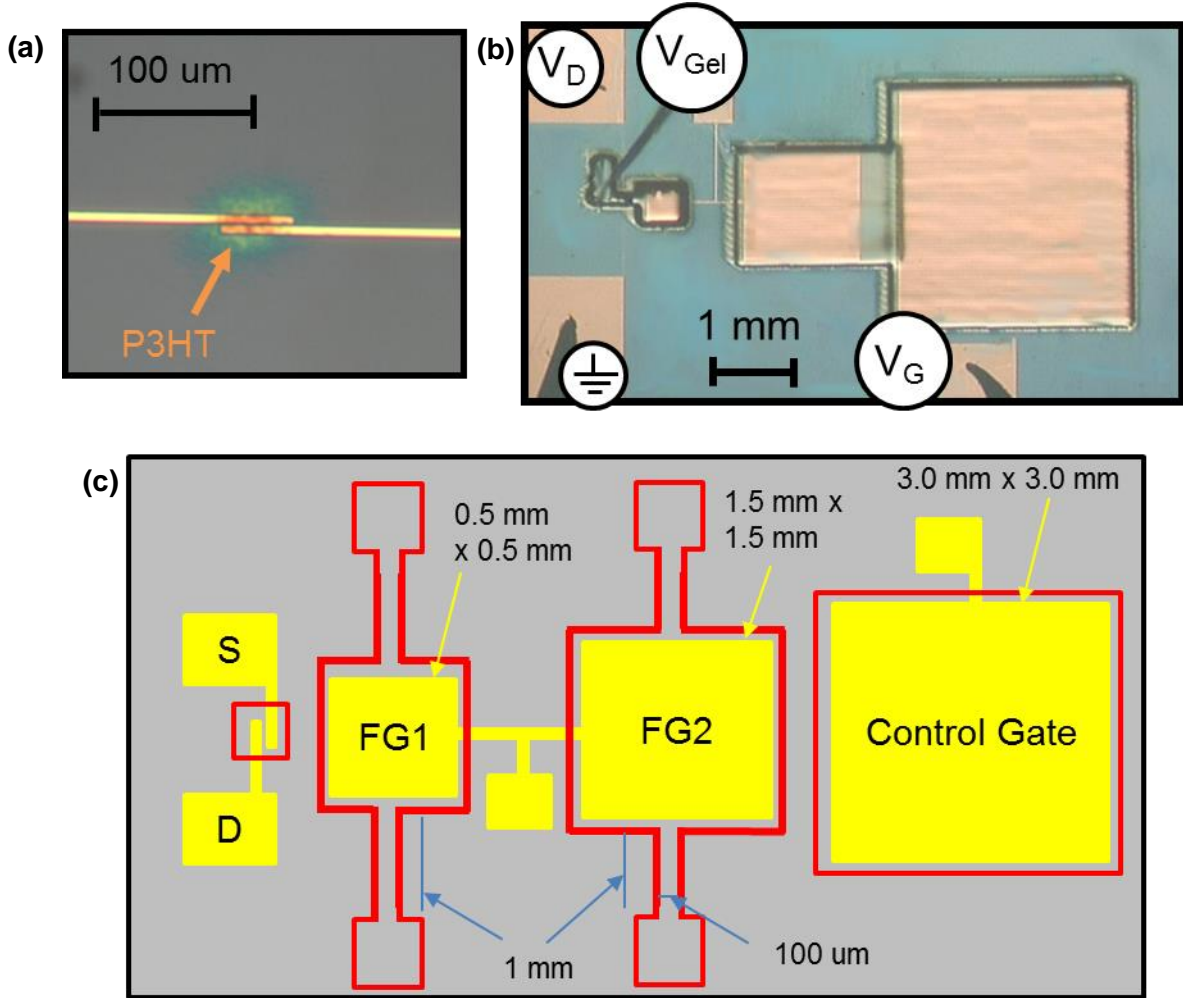

**Figure S1: Device Structure.** (a) is an image of the printed P3HT film (50 nm) with  $W/L = 40 \mu\text{m}/2 \mu\text{m}$ . (b) is an image of an FG-EGT with  $A_{\text{FG1}} = 150A_{\text{P3HT}}$ ,  $A_{\text{FG2}} = 1500A_{\text{P3HT}}$  and  $A_{\text{CG}} = 6000A_{\text{P3HT}}$ . (c) is a schematic of the FG-EGT with the microfluidic channels (outlined in red) used to selectively functionalize the floating gate with SAMs.

## 2. Derivation of Equations 2-3

Considering the circuit in Figure 1C (two capacitors in series), a charge balance yields

$$Q_{Gate} + Q_{P3HT} = 0 \quad (S1)$$

substituting in the definition of capacitance ( $Q = CV$ )

$$C_{Gate}(V_{Gel} - V_G) + C_{P3HT}V_{Gel} = 0 \quad (S2)$$

and rearranging for Equation 2 after substituting  $C = C_iA$

$$V_{Gel} = \frac{1}{1 + \frac{C_{i,P3HT}A_{P3HT}}{C_{i,Gate}A_{Gate}}} V_G \quad (2)$$

Rearranging further results in Equation 3, the fraction of voltage dropped at the gate electrode

$$F^{Gate} = \frac{V_G - V_{Gel}}{V_G} = \frac{1}{1 + \frac{C_{i,Gate}A_{Gate}}{C_{i,P3HT}A_{P3HT}}} \quad (3)$$

To overcome experimental limitations, mainly the variability of open circuit voltage of the quasi-reference Pt electrode, we considered the slope of  $V_{Gel}-V_G$

$$\frac{dV_G}{dV_{Gel}} = 1 + \frac{C_{i,P3HT}A_{P3HT}}{C_{i,Gate}A_{Gate}} \quad (S3)$$

When plotting this relationship, we found that the slope of  $dV_G/dV_{Gel}$  with respect to  $A_{P3HT}/A_{Gate}$  is  $\sim 8$ , representing the ratio of specific capacitances.

However, the intercept was not unity, and instead 1.17.

We attribute this area-independent potential drop to a combination of series resistance through the ion-gel bulk and a parallel resistance at the gate electrode interface due to charge transfer and electrode polarization. This is sketched in Figure S2.

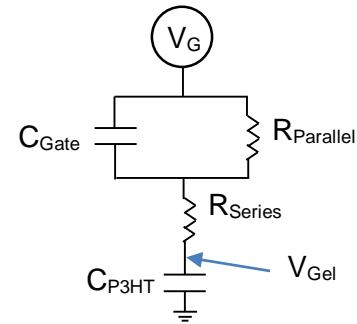

**Figure S2:** Sketch of a more advanced equivalent circuit of an EGT.

**3. Additional data on hysteresis effects in FG-EGTs.** In addition to altering the relationship between  $V_G$  and  $V_{Gel}$ , lowering the gate area also affects the hysteresis in an EGT. We observed a systematic increase in hysteresis, defined as the difference in  $V_G$  between the forward and reverse sweep at the same  $I_D$  (Figure S3A), with lowered gate area (Figure S3B). We attributed this to a combination of potential dependent capacitance, overpotentials associated with interfacial charge transfer, and mass transport limitations of ions into the P3HT film as discussed in the main text.

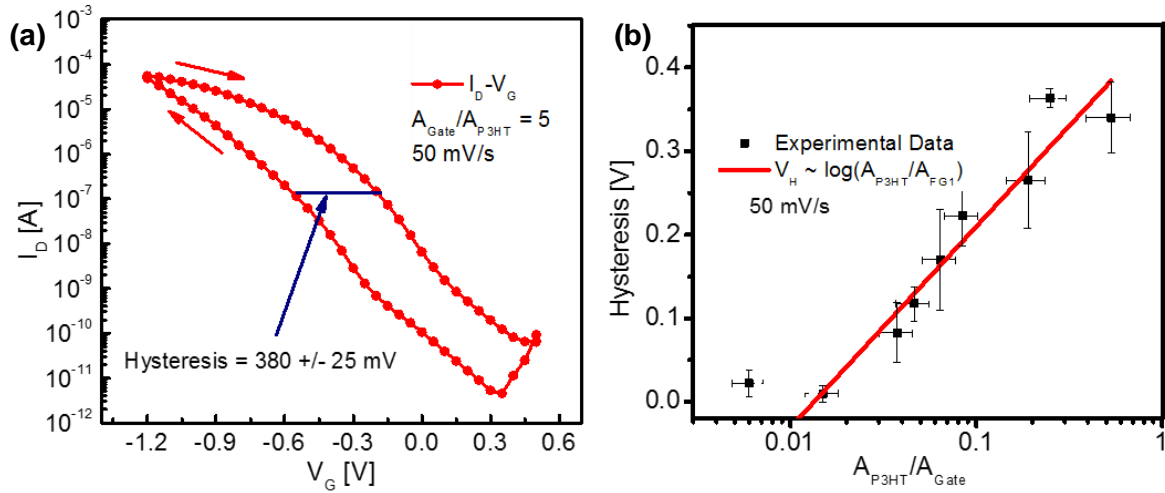

**Figure S3: Hysteresis in an EGT.** (a) is an EGT with  $A_{Gate}/A_{P3HT} = 5$  and a significant hysteresis of  $380 \pm 25$  mV, calculated by measuring the difference in  $V_G$  between the forward and reverse sweep at the same  $I_D$ . This calculation is repeated for multiple  $A_{Gate}$  values and plotted in (b) with a logarithmic fit in red.

#### 4. Derivation of Equations 4-6

Considering the circuit in Figure 1F (two capacitors in series and an additional parasitic capacitor), we compared the effect of applying  $V_G$  to the floating gate ( $V_G^{EGT}$ ) and control gate ( $V_G^{CG}$ ) by performing a charge balance and assuming  $I_D$  directly reflects the charge on  $C_{1E}$  ( $Q_{1E}$ ).

$$\Delta Q_{1E} = 0 \quad (S4)$$

Substituting in the definition of capacitance ( $Q = CV$ ) yields

$$C_{1E}V_G^{EGT} - C_{1E}V_F = 0 \quad (S5)$$

Next, perform a charge balance on the node labeled “ $V_F$ ” in Figure 1F while assuming  $Q^* = 0$  to express  $V_F$  in terms of  $V_G^{CG}$  analogous to the derivation of Equation 2

$$V_F = \frac{1}{1 + \frac{C_{1E}}{C_{2E}}} V_G^{CG} \quad (S6)$$

Substitute Equation S6 into Equation S5 for Equation 4 in the text,

$$V_G^{CG} = \left( \frac{C_{1E}}{C_{2E}} + 1 \right) V_G^{EGT} \quad (4)$$

Next, introducing a stray capacitor with  $Q^*$  stored on it requires modification of the charge balance on the node labeled “ $V_F$ ”

$$Q_{1E} + Q_{2E} + Q^* = 0 \quad (S7)$$

Substituting in the definition of capacitance furnishes

$$C_{1E}V_F + C_{2E}(V_F - V_G^{CG}) + Q^* = 0 \quad (S8)$$

Rearranging results in Equation 5 in the text,

$$V_F = \frac{C_{2E}}{C_{1E} + C_{2E}} V_G^{CG} - \frac{Q^*}{C_{1E} + C_{2E}} \quad (5)$$

To account for  $Q^*$  empirically, we assumed that it is a constant fraction of the charge stored in  $C_{2E}$ , but opposite in sign, so that  $f = Q^* / -Q_{2E}$  and substituted this into Equation 5

$$V_F = \frac{C_{2E}}{C_{1E} + C_{2E}} V_G^{CG} + \frac{f C_{2E} (V_F - V_G^{CG})}{C_{1E} + C_{2E}} \quad (\text{S9})$$

Rearranging for  $V_F$  in terms of  $V_G^{CG}$  yields

$$V_F = (1 - f) \frac{1}{1 + \frac{C_{1E}}{C_{2E}}} V_G^{CG} + f \frac{1}{1 + \frac{C_{1E}}{C_{2E}}} V_F \quad (\text{S10})$$

$$\left( (1 - f) + \frac{C_{1E}}{C_{2E}} \right) V_F = (1 - f) V_G^{CG} \quad (\text{S11})$$

$$V_F = \frac{1}{1 + \frac{1}{1 - f} \frac{C_{1E}}{C_{2E}}} V_G^{CG} \quad (\text{S12})$$

Substituting Equation S12 back into Equation S5 above results in Equation 6 in the text,

$$V_G^{CG} = \left( \frac{C_{1E}}{C_{2E}} \frac{1}{1 - f} + 1 \right) V_G^{EGT} \quad (6)$$
